# Supplementary material for: Why the Monophyly of Nymphaeaceae Currently Remains Indeterminate: An Assessment Based on Gene-Wise Plastid Phylogenomics
Source: Preprints.org preprint supplement (doi:10.20944/preprints201905.0002.v1), 2019-05-03

## SUPPLEMENTAL MATERIAL

---

### Why the monophyly of Nymphaeaceae currently remains indeterminate: An assessment based on gene-wise plastid phylogenomics

Michael Gruenstaeudl<sup>1\*</sup>

<sup>1</sup> Institut für Biologie, Freie Universität Berlin, 14195 Berlin, Germany

\* [m.gruenstaeudl@fu-berlin.de](mailto:m.gruenstaeudl@fu-berlin.de)

---

**Figure S1.** Results of the gene-wise phylogenetic reconstructions under the ML inference criterion on each of the 78 protein-coding plastome genes under study. Bootstrap support values are given above the branches. For easier viewing, all taxa of the Nymphaeaceae are indicated by a red bar to the right of their taxon names.

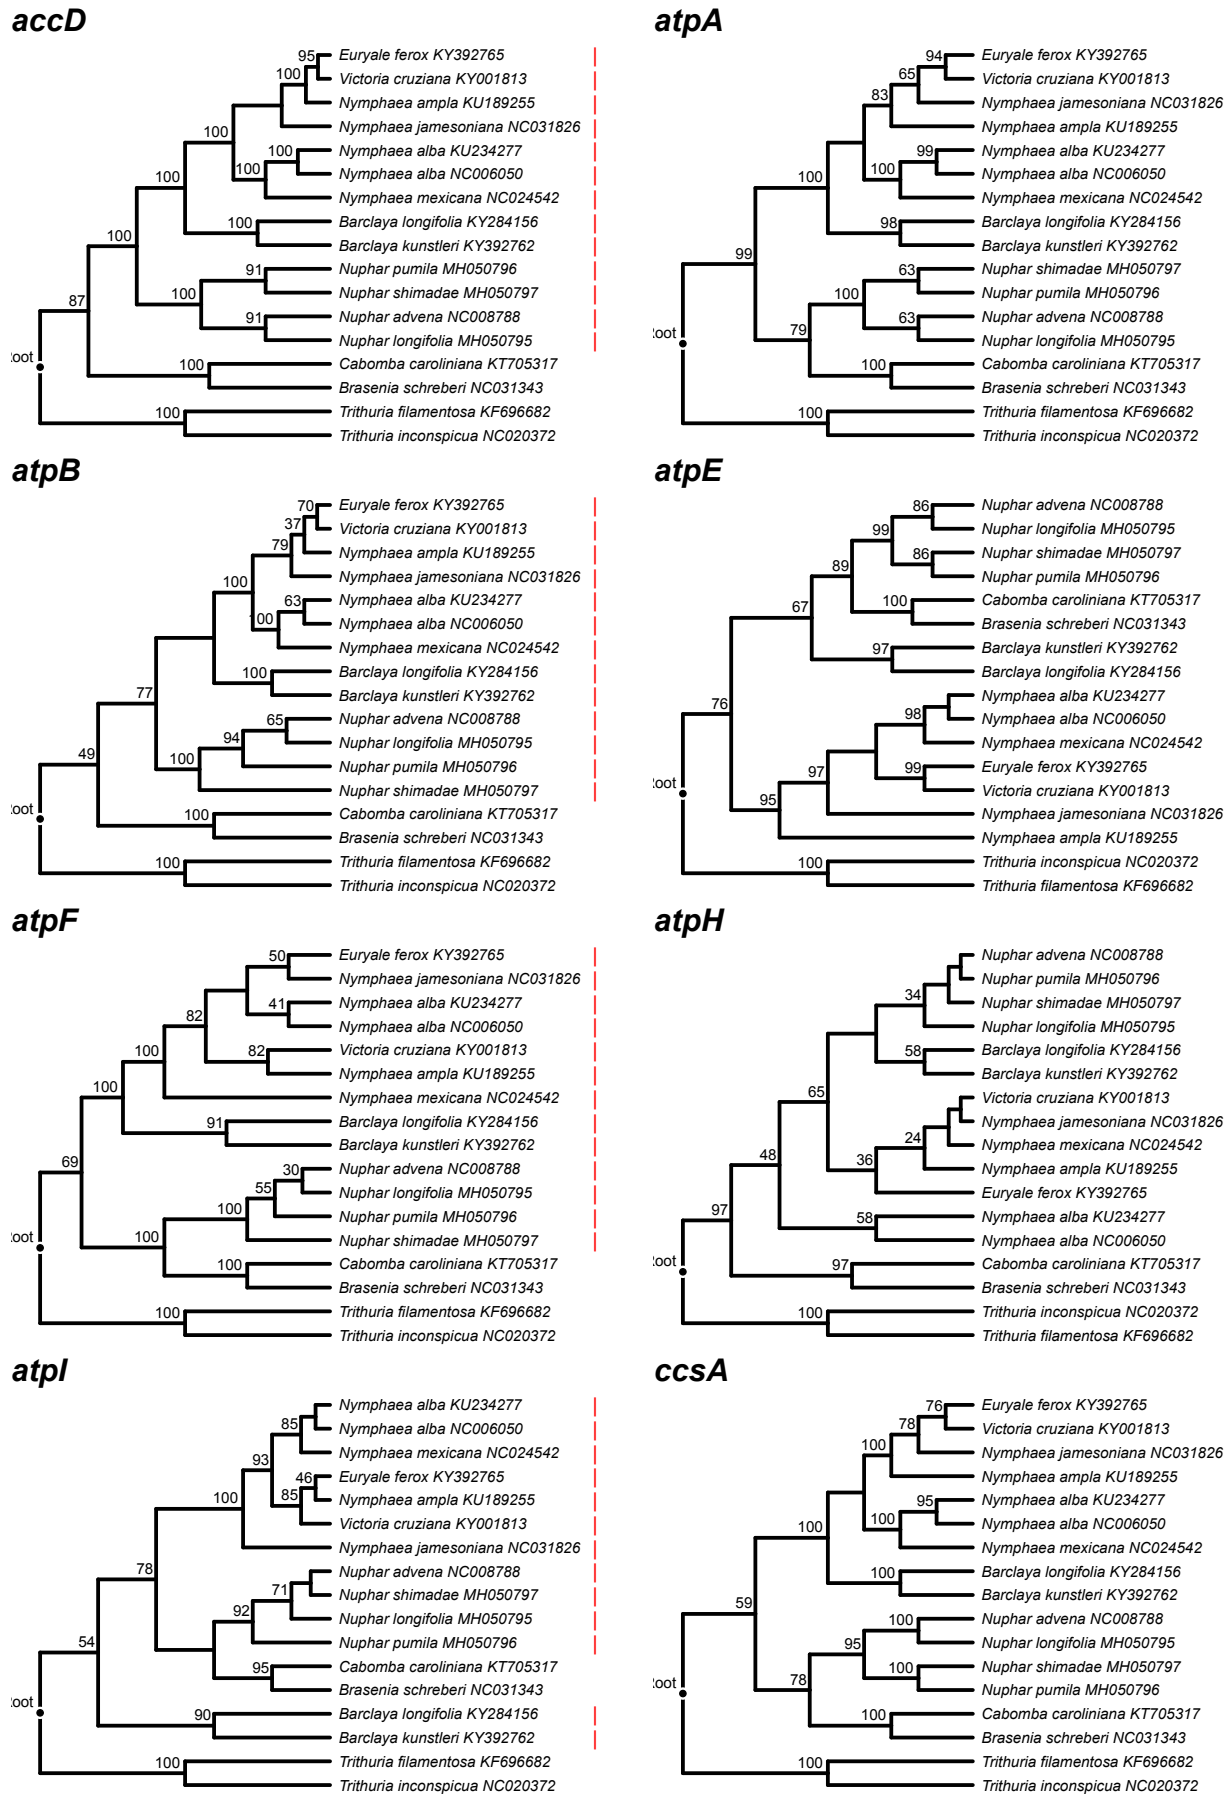

Figure S1

**cemA**

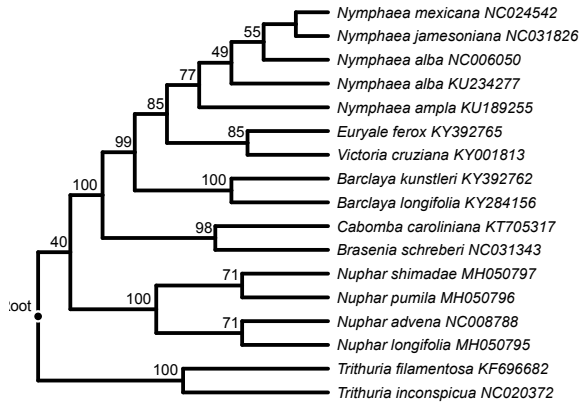

**infA**

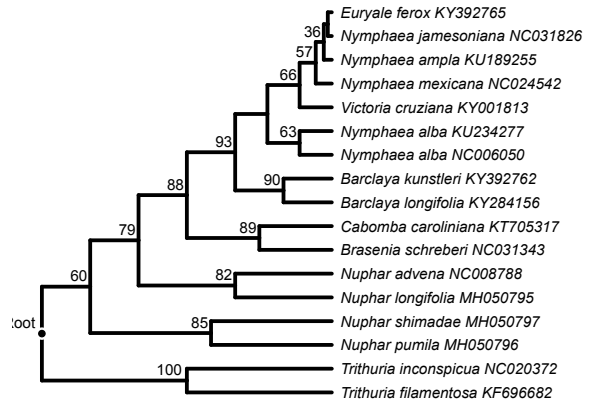

**matK**

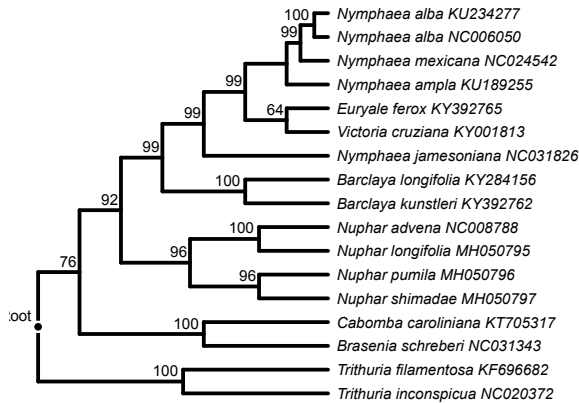

**ndhA**

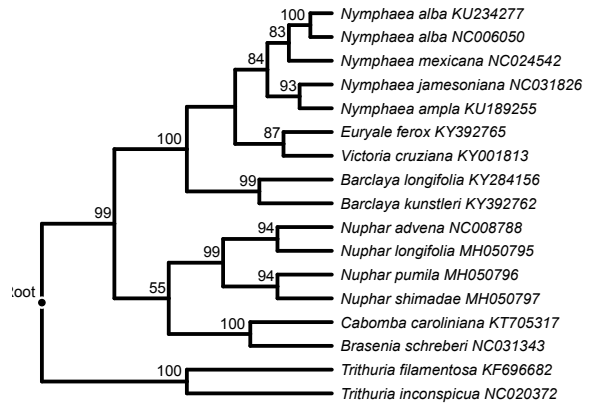

**ndhB**

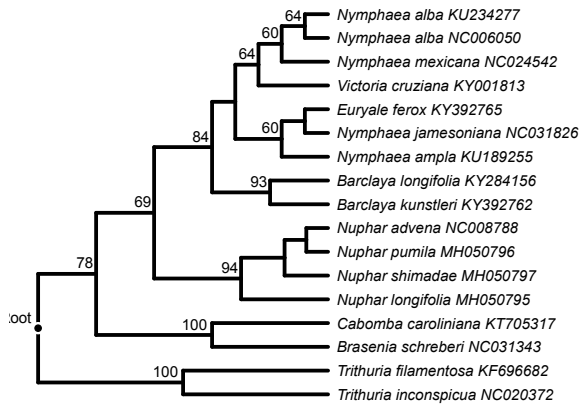

**ndhC**

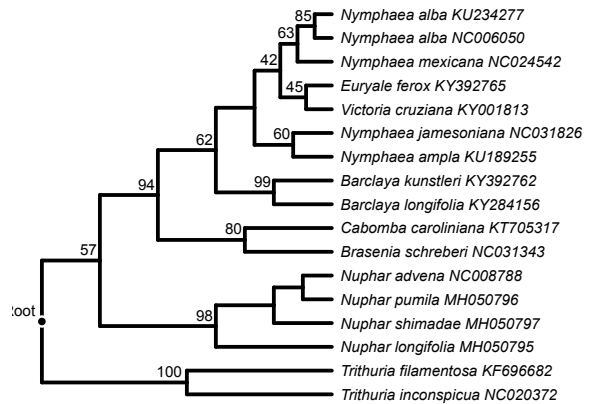

**ndhD**

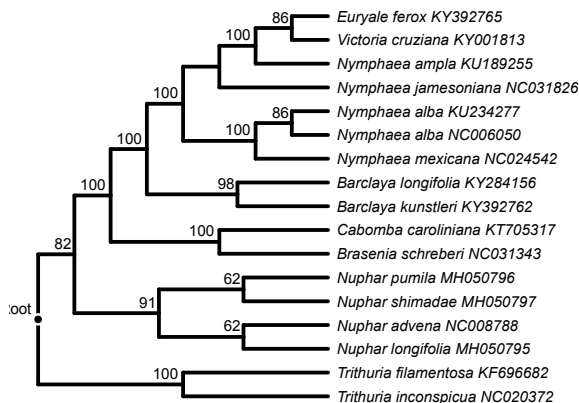

**ndhE**

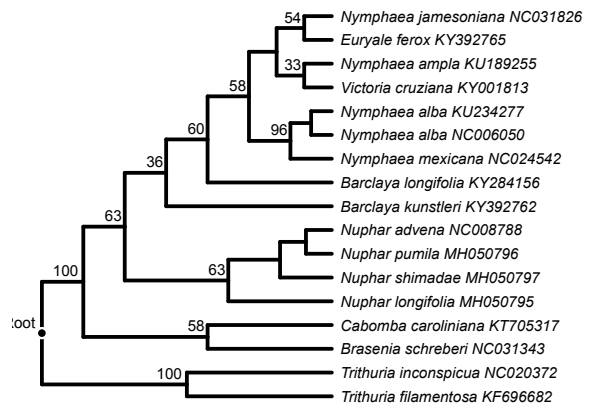

**ndhF**

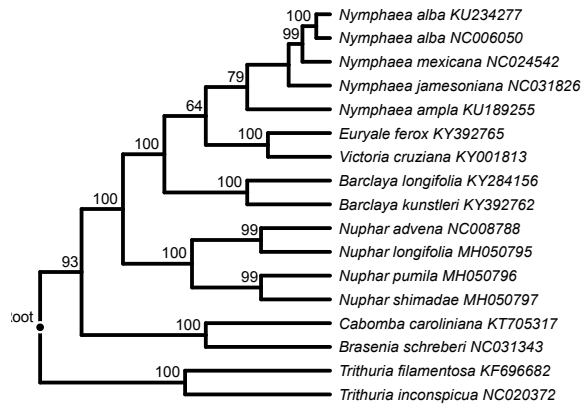

**ndhG**

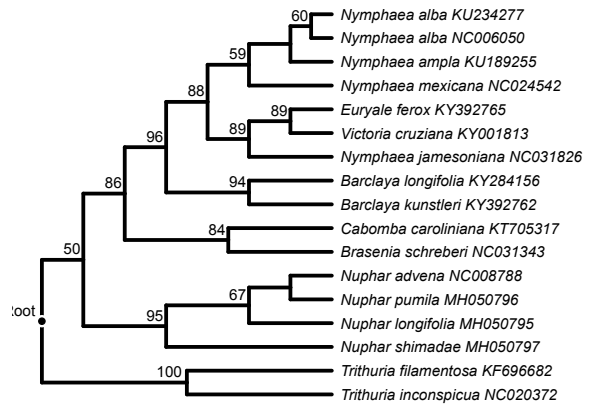

**ndhH**

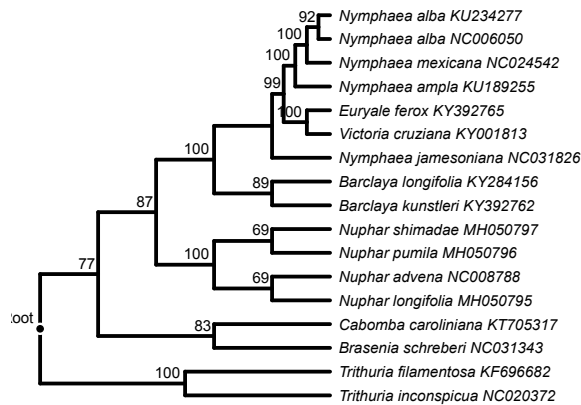

**ndhI**

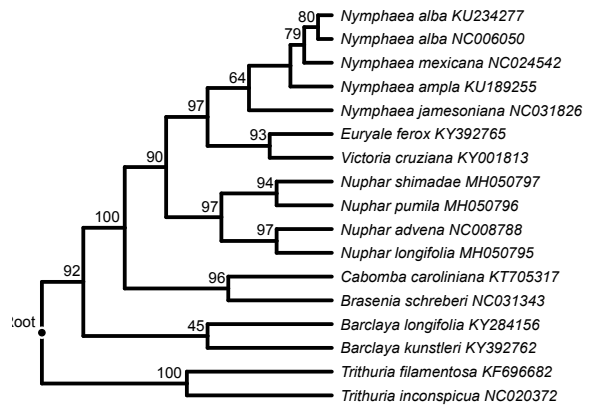

**ndhJ**

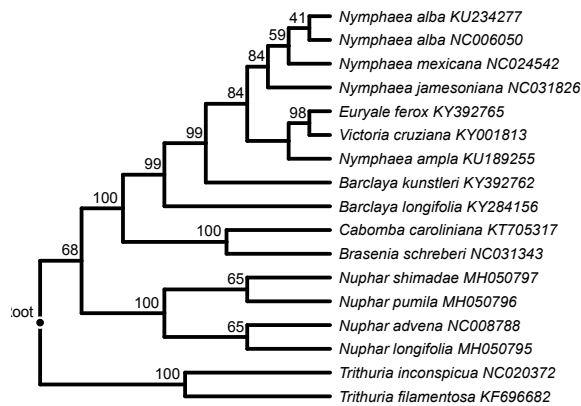

**ndhK**

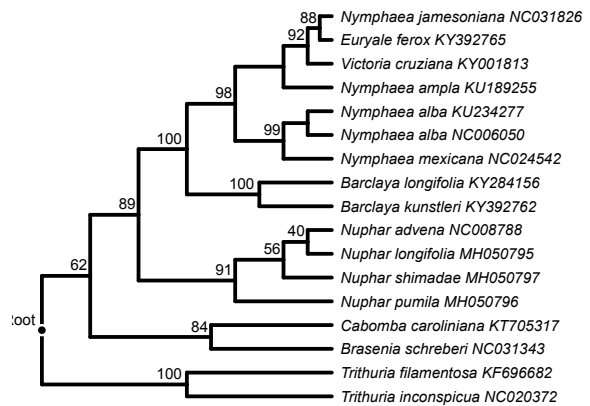

**petA**

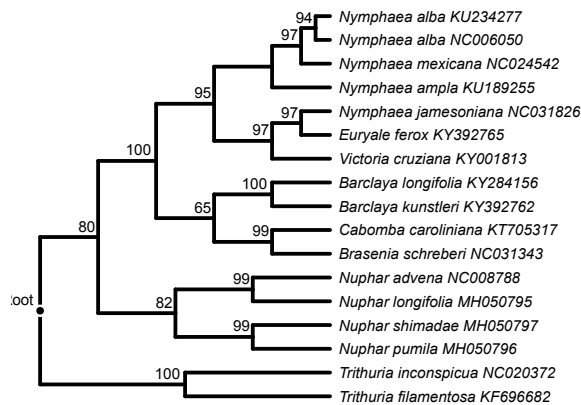

**petB**

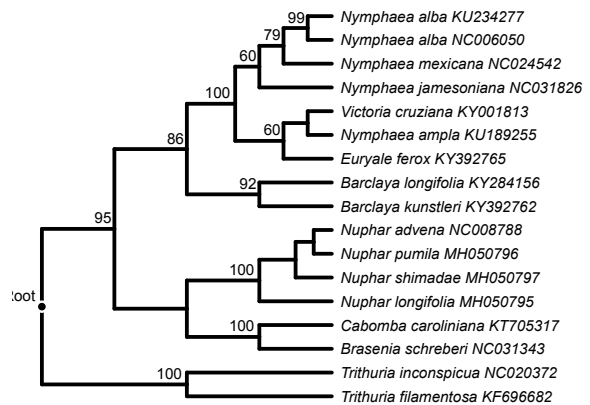

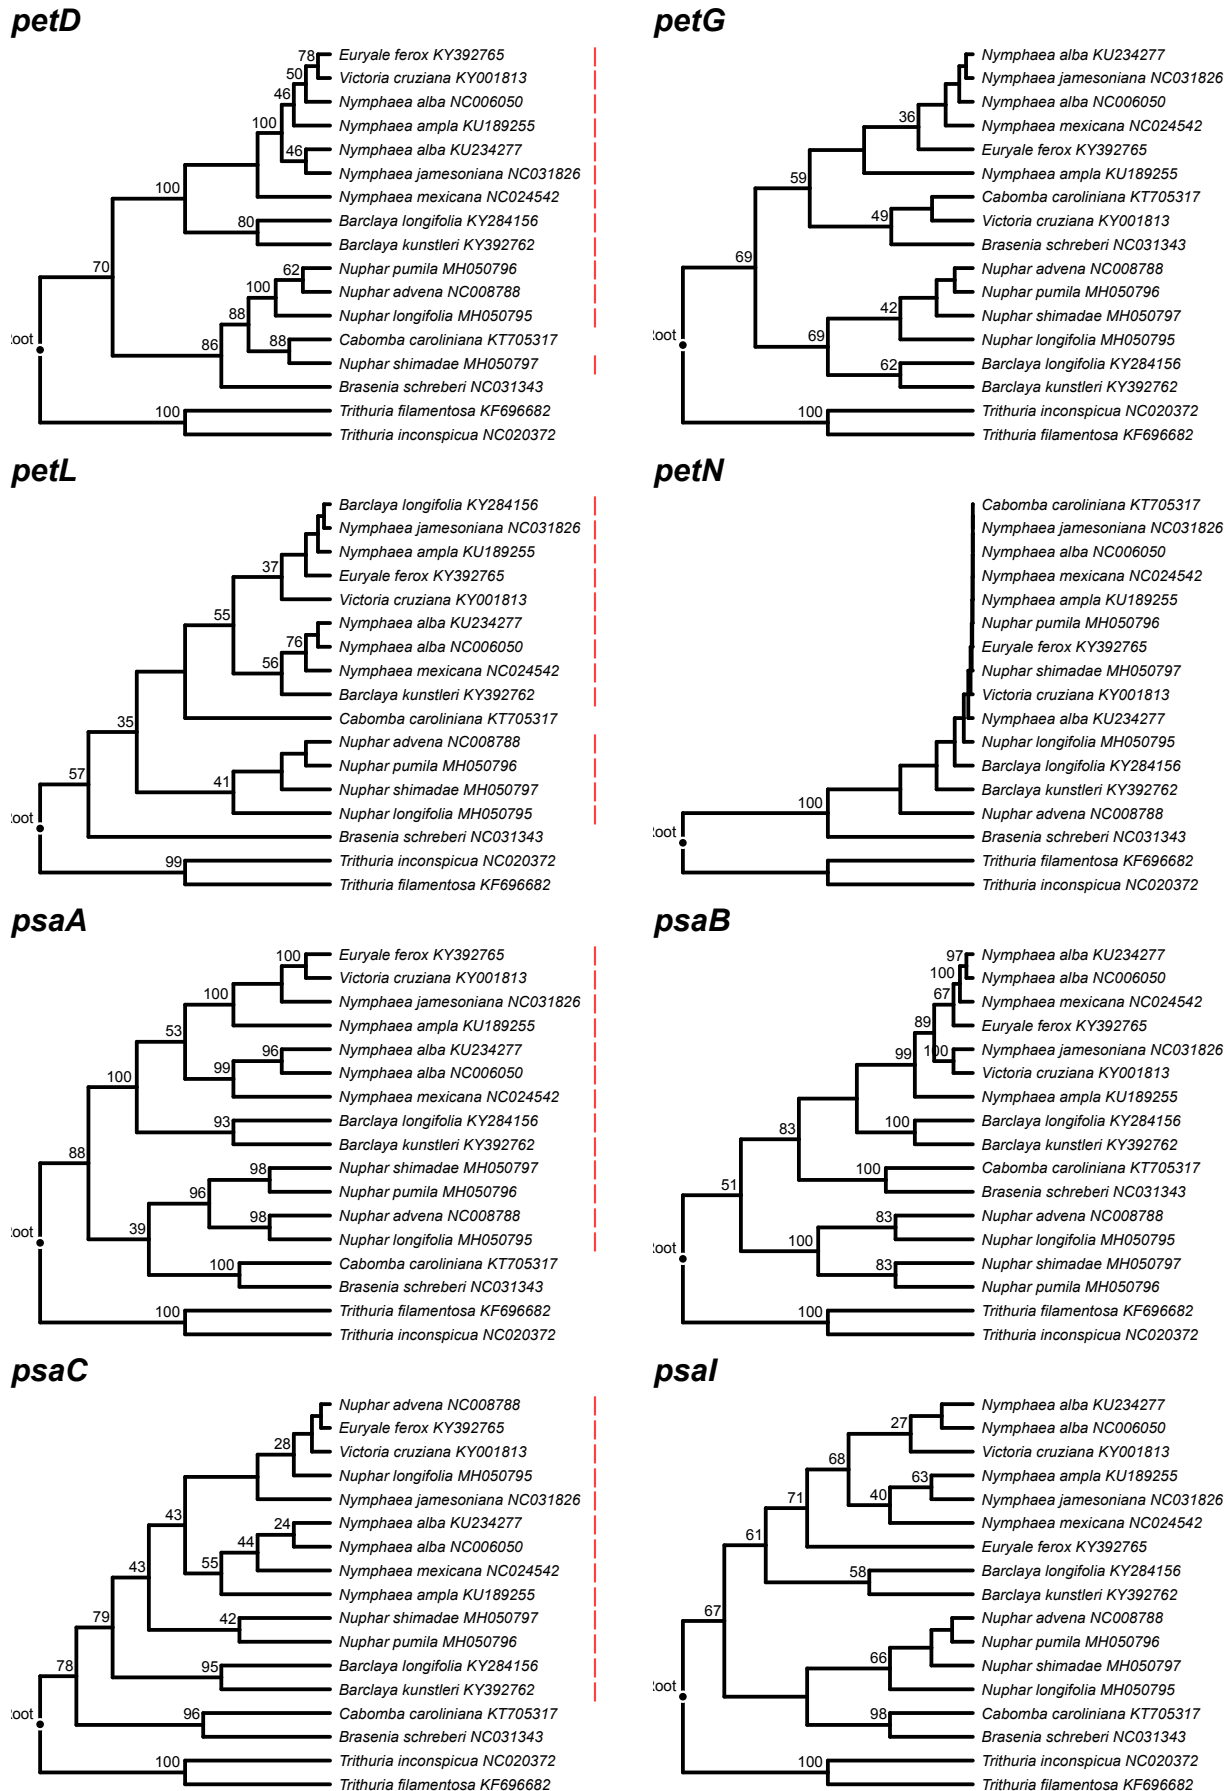

**psaJ**

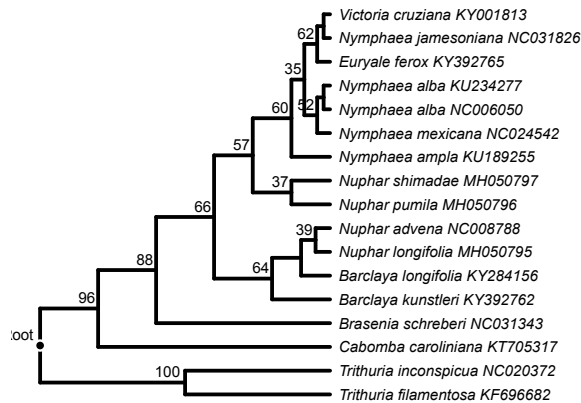

**psbA**

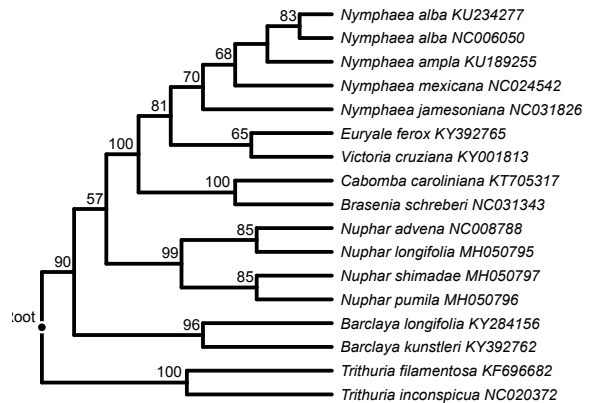

**psbB**

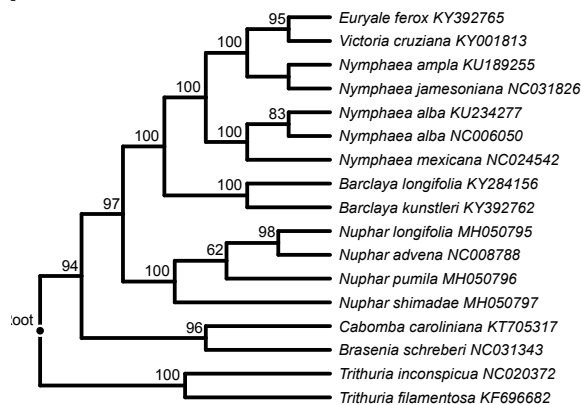

**psbC**

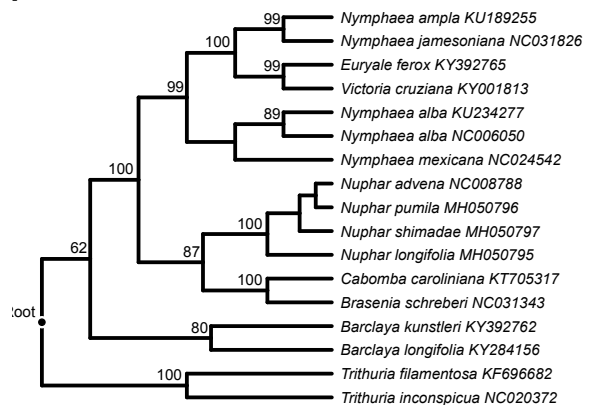

**psbD**

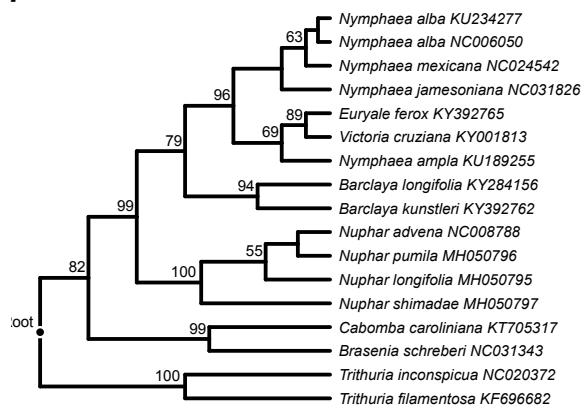

**psbE**

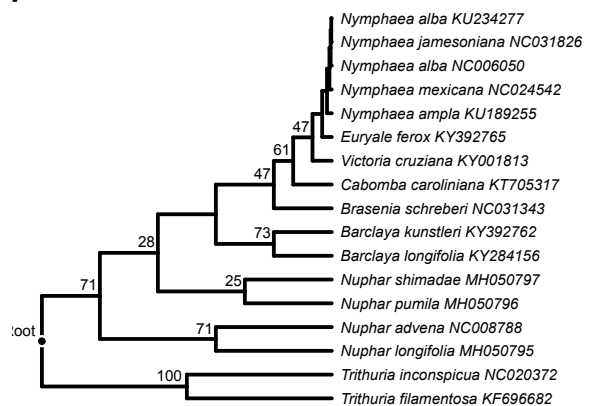

**psbF**

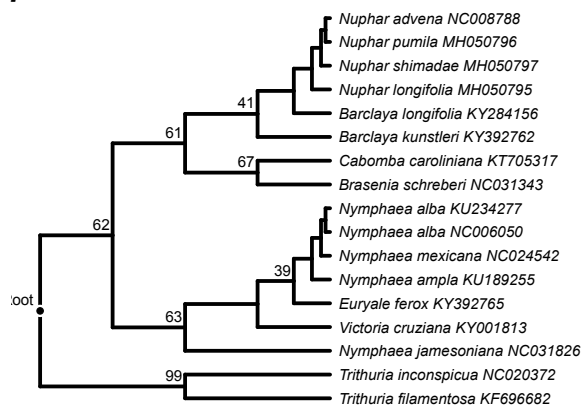

**psbH**

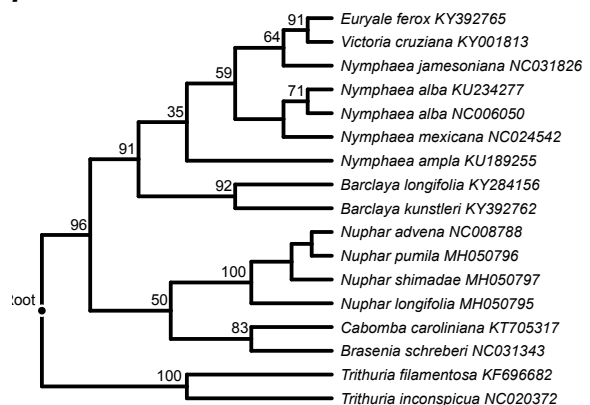



**psbI**

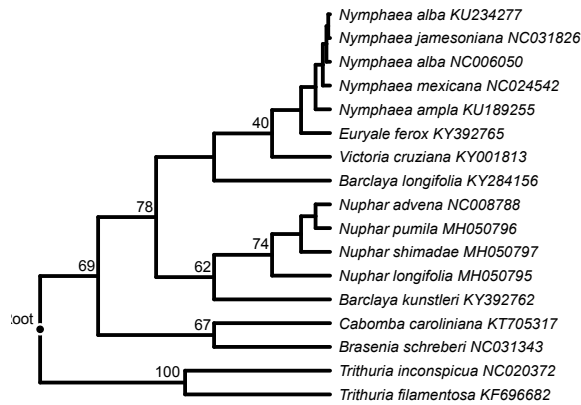

**psbJ**

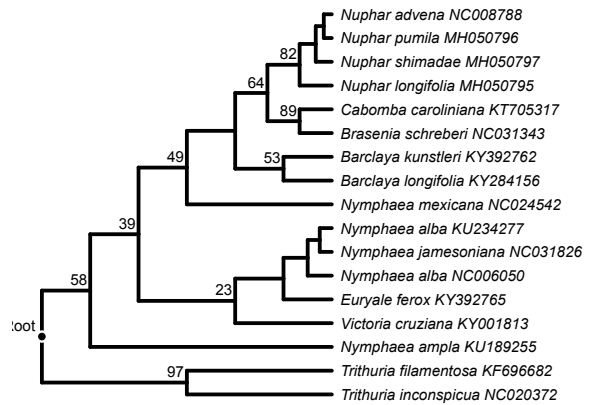

**psbK**

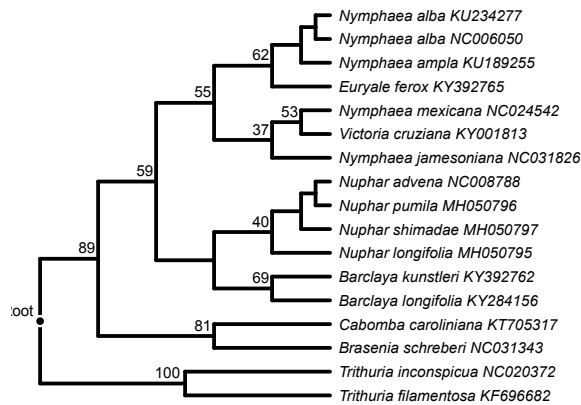

**psbL**

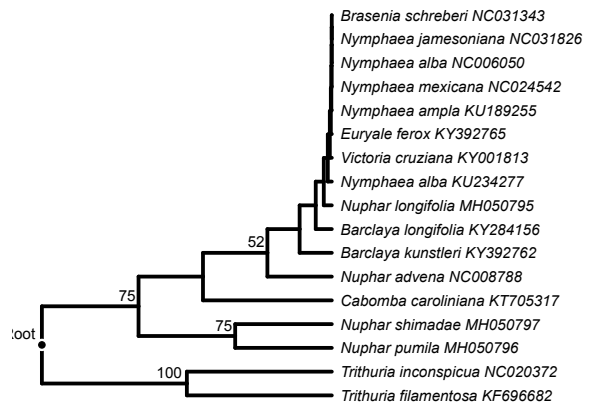

**psbM**

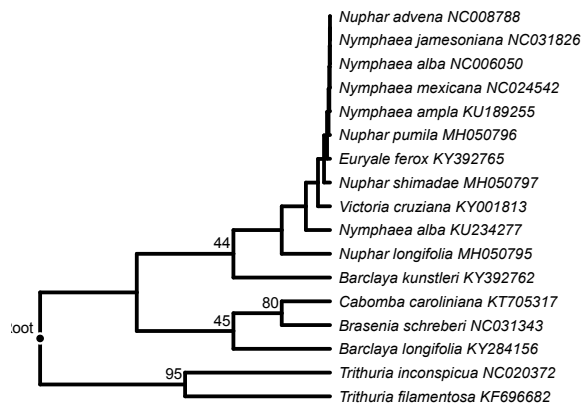

**psbN**

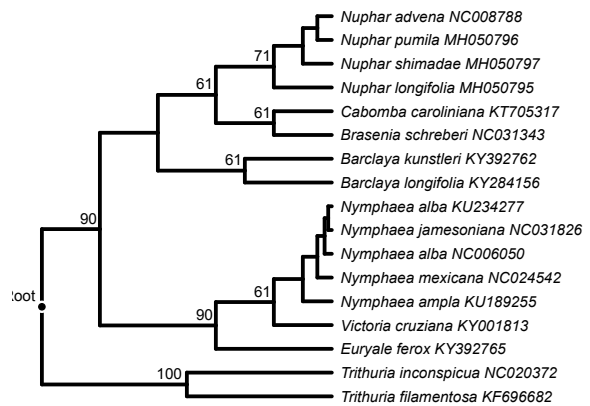

**psbT**

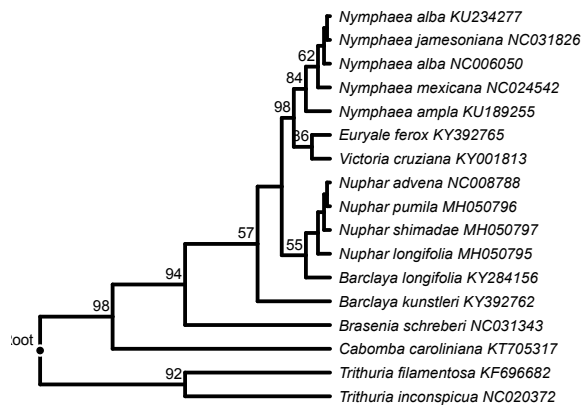

**psbZ**

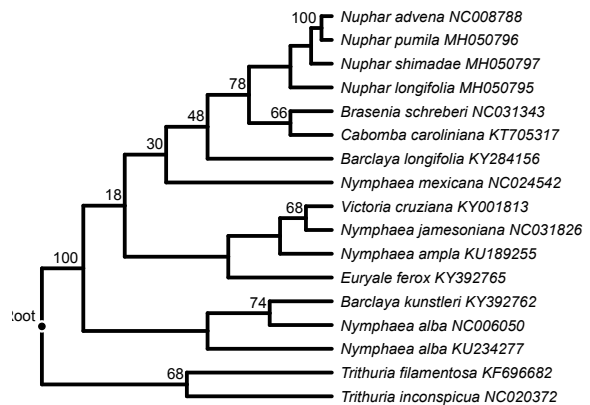

***rbcL***

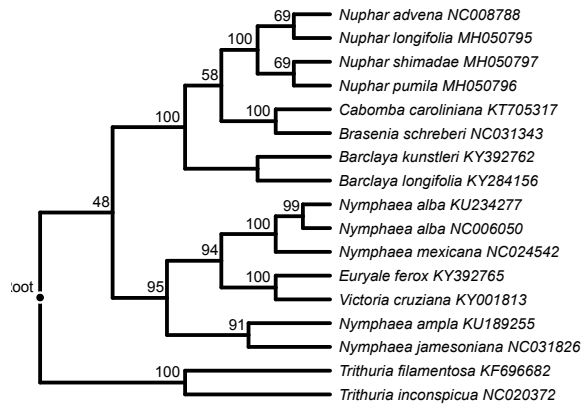

***rpl14***

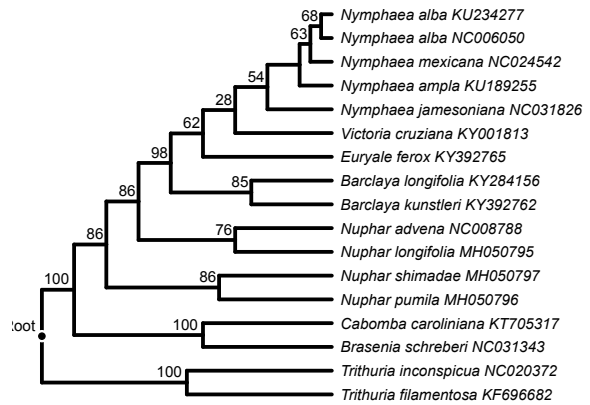

***rpl16***

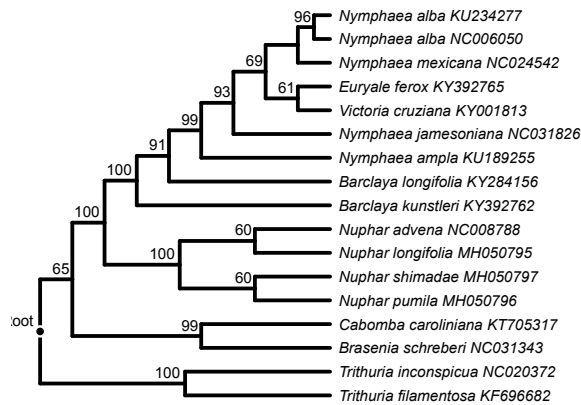

***rpl2***

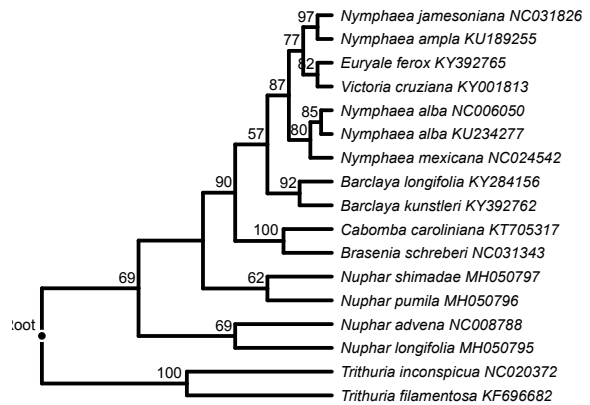

***rpl20***

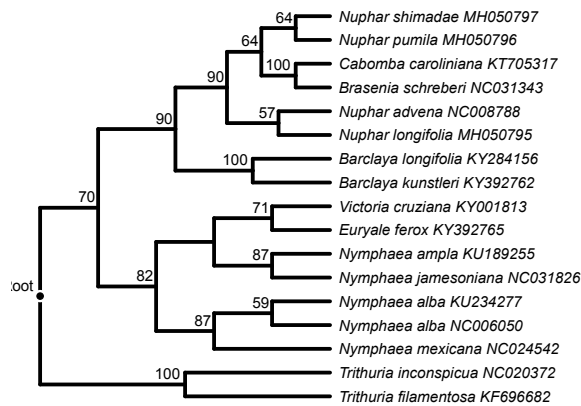

***rpl22***

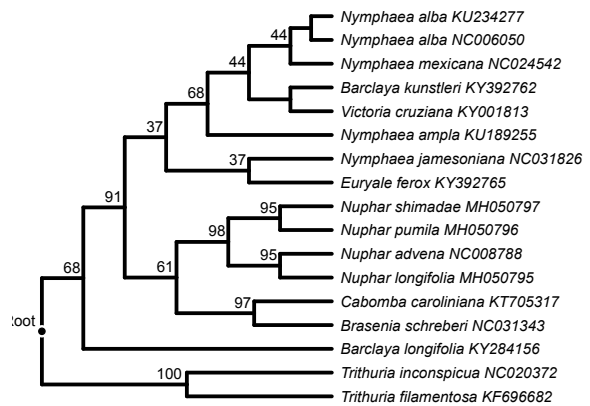

***rpl23***

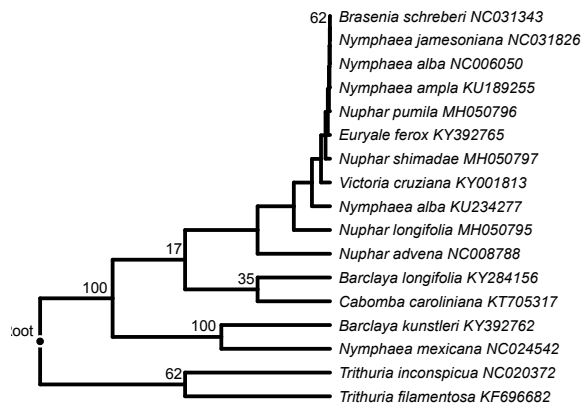

***rpl32***

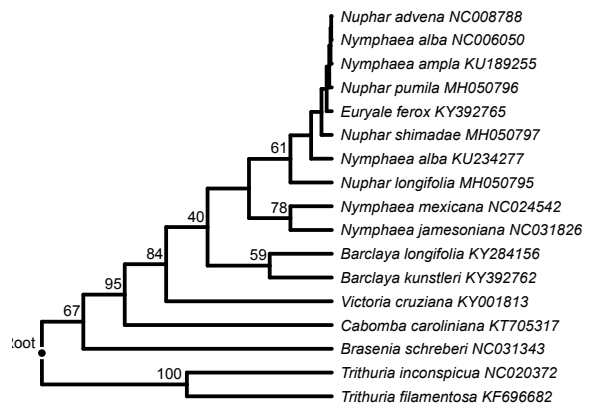



***rpl33***

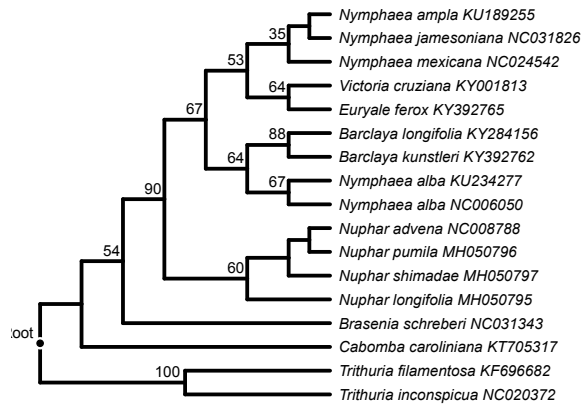

***rpl36***

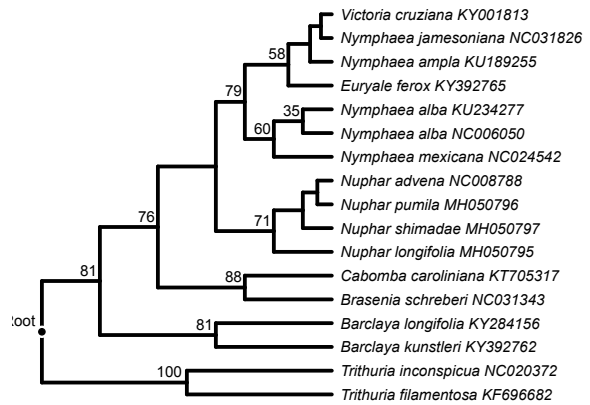

***rpoA***

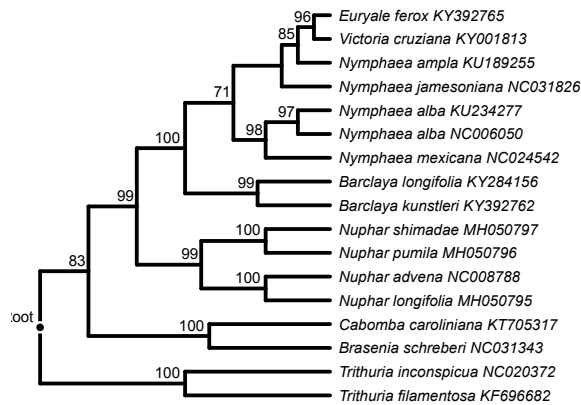

***rpoB***

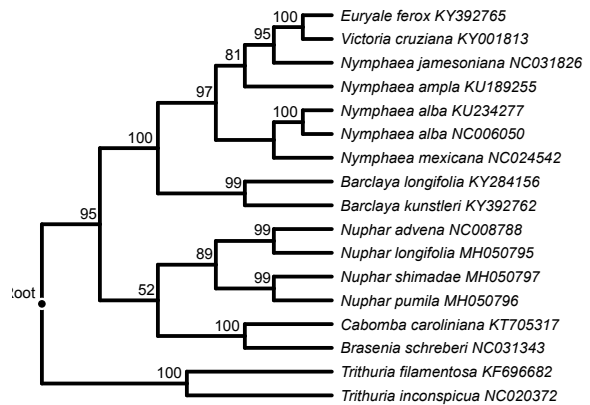

***rpoC1***

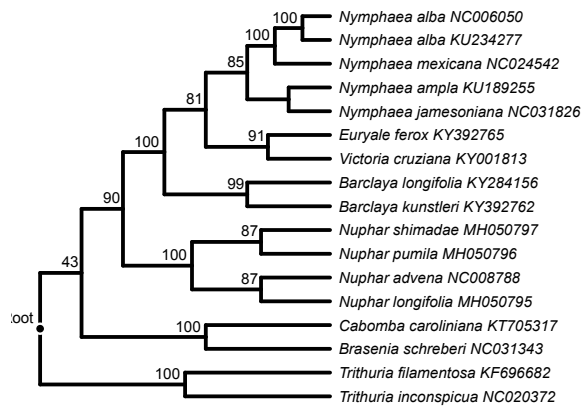

***rpoC2***

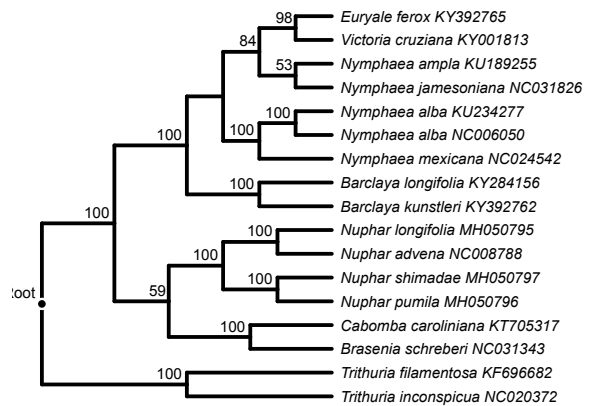

***rps11***

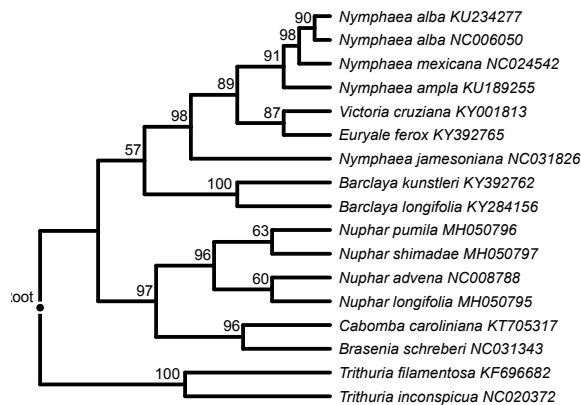

***rps12***

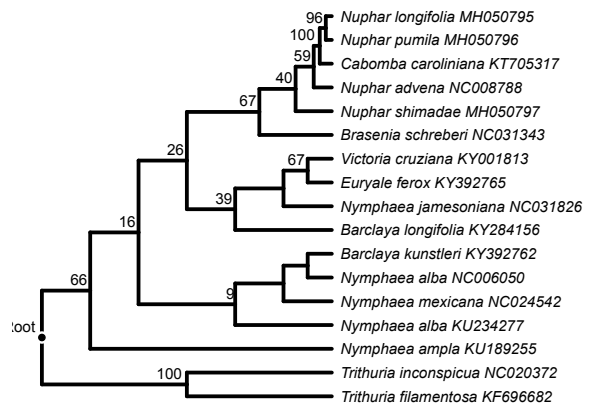

**rps14**

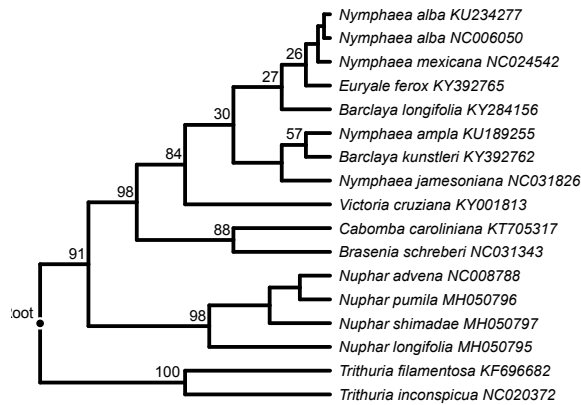

**rps15**

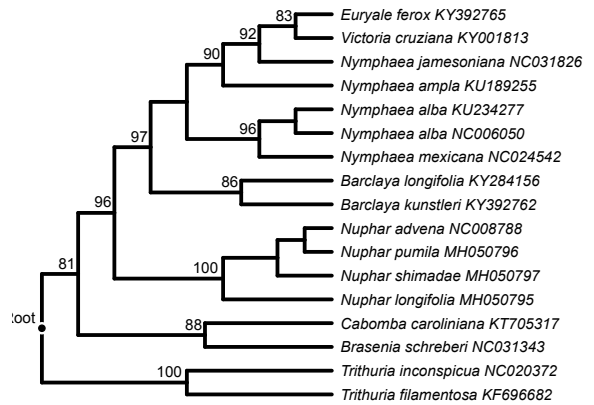

**rps16**

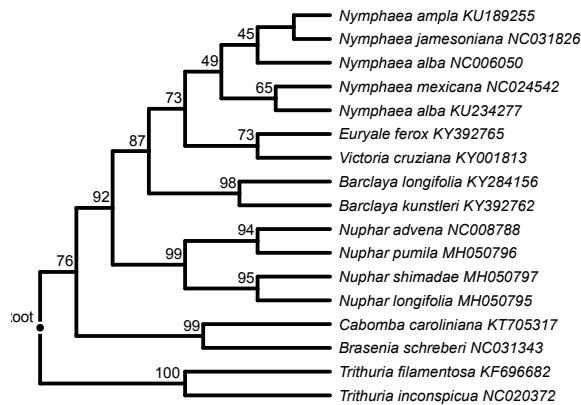

**rps18**

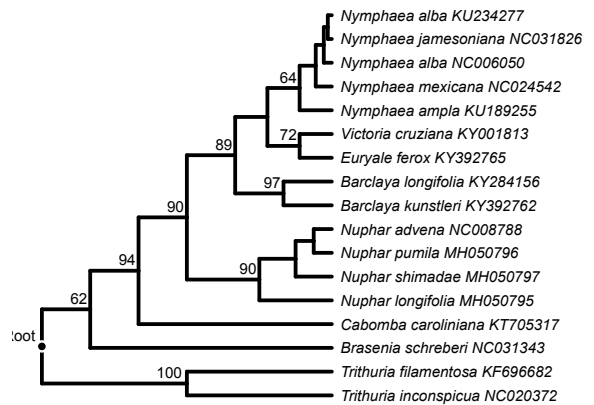

**rps19**

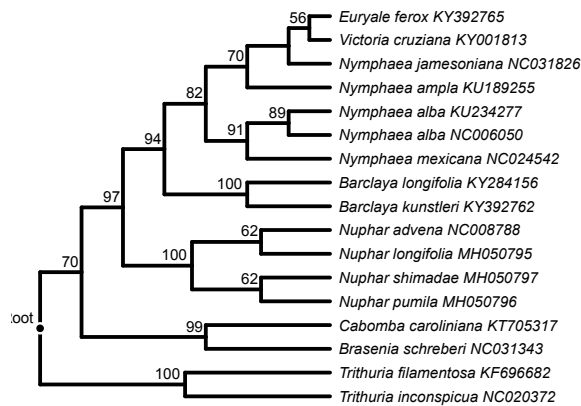

**rps2**

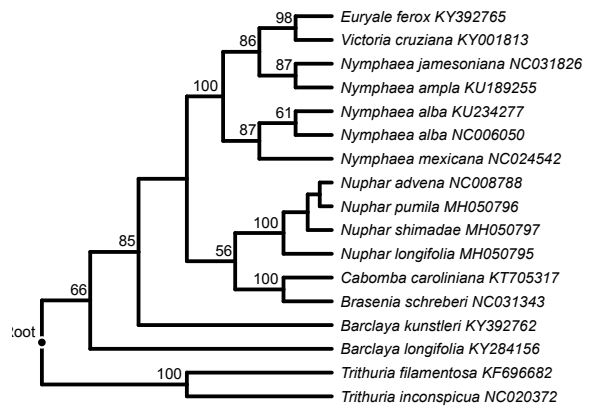

**rps3**

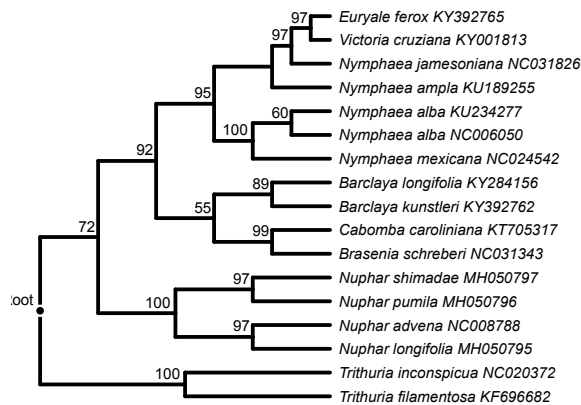

**rps4**

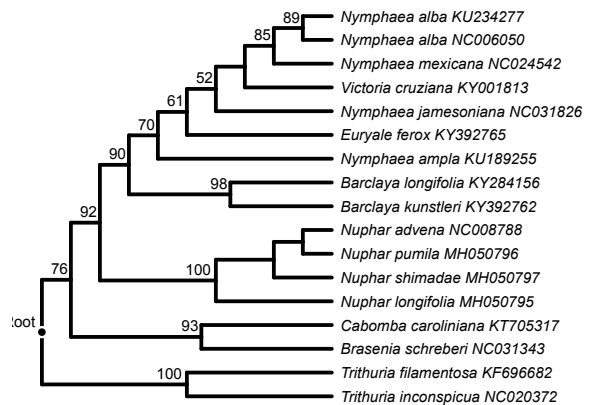

**rps7**

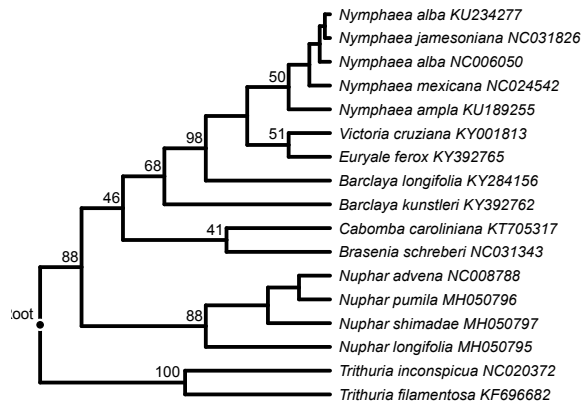

**rps8**

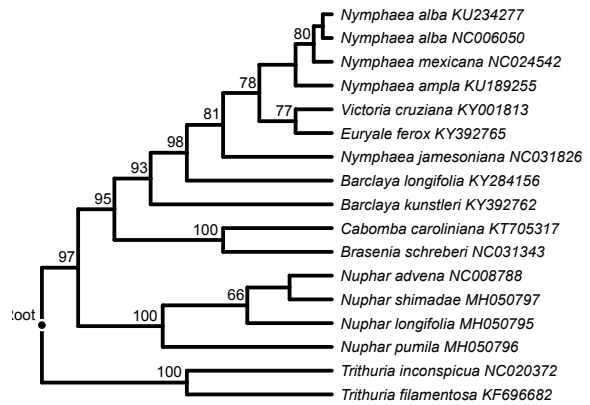

**ycf1**

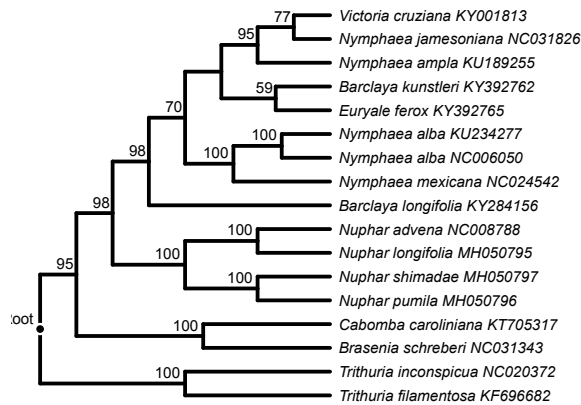

**ycf2**

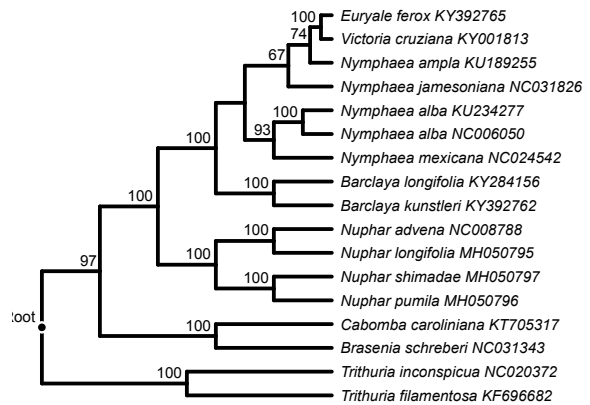

**ycf3**

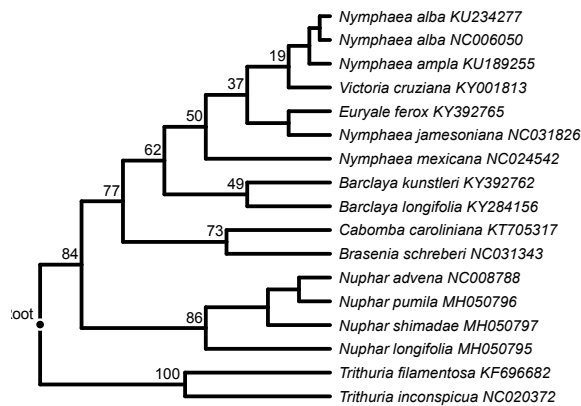

**ycf4**

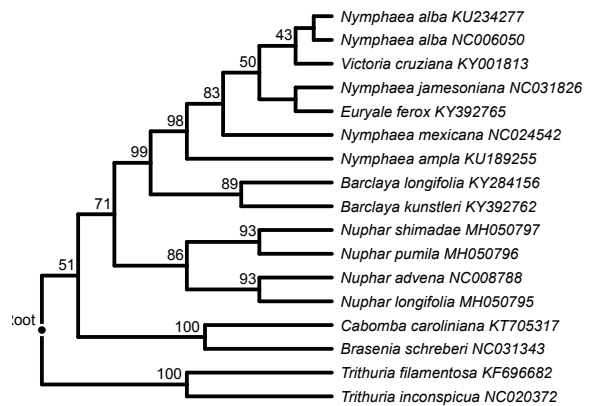

Supplement: Supplementary file 1 [file supplementary]
