# Supplementary material for: Why the Monophyly of Nymphaeaceae Currently Remains Indeterminate: An Assessment Based on Gene-Wise Plastid Phylogenomics
Source: Preprints.org preprint supplement (doi:10.20944/preprints201905.0002.v1), 2019-05-03
Supplement: Supplementary file 2 [file supplementary]

### Why the monophyly of Nymphaeaceae currently remains indeterminate: An assessment based on gene-wise plastid phylogenomics

Michael Gruenstaeudl<sup>1\*</sup>

<sup>1</sup> Institut für Biologie, Freie Universität Berlin, 14195 Berlin, Germany

\* [m.gruenstaeudl@fu-berlin.de](mailto:m.gruenstaeudl@fu-berlin.de)

---

**Table S2.** Results of calculating eight different sequence variability and homoplasy metrics that form the basis for the multiple logistic regression tests of possible effects on the phylogenetic tree inference. Abbreviations used: Length = alignment length; GC = GC content; Polymorphic = fraction of polymorphic sites; Informative = fraction of parsimony-informative sites; CI = consistency index; RI = retention index; RC = rescaled consistency index; P-distance = maximum uncorrected p-distance.

| #  | Gene          | Length | GC    | Polymorphic | Informative | CI    | RI    | RC    | P-distance |
|----|---------------|--------|-------|-------------|-------------|-------|-------|-------|------------|
| 1  | <i>78 CDS</i> | 71616  | 0.394 | 0.309       | 0.143       | 0.86  | 0.868 | 0.747 | 0.379      |
| 2  | <i>ycf1</i>   | 6999   | 0.336 | 0.999       | 0.306       | 0.888 | 0.891 | 0.791 | 0.72       |
| 3  | <i>rps15</i>  | 261    | 0.378 | 0.284       | 0.234       | 0.838 | 0.882 | 0.739 | 0.459      |
| 4  | <i>rpl32</i>  | 171    | 0.332 | 0.386       | 0.216       | 0.94  | 0.932 | 0.876 | 0.497      |
| 5  | <i>atpE</i>   | 402    | 0.428 | 0.241       | 0.214       | 0.879 | 0.897 | 0.789 | 0.436      |
| 6  | <i>ndhF</i>   | 2262   | 0.353 | 0.28        | 0.214       | 0.867 | 0.888 | 0.77  | 0.439      |
| 7  | <i>rps19</i>  | 297    | 0.416 | 0.323       | 0.202       | 0.867 | 0.917 | 0.794 | 0.435      |
| 8  | <i>infA</i>   | 246    | 0.378 | 0.28        | 0.199       | 0.934 | 0.946 | 0.884 | 0.456      |
| 9  | <i>matK</i>   | 1536   | 0.362 | 0.267       | 0.197       | 0.9   | 0.904 | 0.813 | 0.433      |
| 10 | <i>ccsA</i>   | 957    | 0.347 | 0.262       | 0.192       | 0.898 | 0.912 | 0.819 | 0.424      |
| 11 | <i>rpoC2</i>  | 4302   | 0.393 | 0.292       | 0.188       | 0.911 | 0.922 | 0.84  | 0.421      |
| 12 | <i>rpl20</i>  | 351    | 0.416 | 0.245       | 0.185       | 0.947 | 0.946 | 0.896 | 0.434      |
| 13 | <i>accD</i>   | 2016   | 0.376 | 0.508       | 0.179       | 0.904 | 0.92  | 0.832 | 0.476      |
| 14 | <i>rpl22</i>  | 375    | 0.39  | 0.221       | 0.173       | 0.871 | 0.882 | 0.769 | 0.393      |
| 15 | <i>rpoA</i>   | 1038   | 0.38  | 0.248       | 0.173       | 0.889 | 0.911 | 0.81  | 0.392      |
| 16 | <i>rps11</i>  | 414    | 0.465 | 0.198       | 0.169       | 0.918 | 0.938 | 0.861 | 0.384      |
| 17 | <i>rpoC1</i>  | 2157   | 0.397 | 0.27        | 0.164       | 0.934 | 0.939 | 0.877 | 0.425      |
| 18 | <i>rpl33</i>  | 204    | 0.396 | 0.172       | 0.162       | 0.974 | 0.976 | 0.951 | 0.402      |
| 19 | <i>rps8</i>   | 396    | 0.36  | 0.192       | 0.157       | 0.918 | 0.936 | 0.859 | 0.383      |
| 20 | <i>psbH</i>   | 237    | 0.397 | 0.245       | 0.156       | 0.863 | 0.905 | 0.781 | 0.382      |
| 21 | <i>cemA</i>   | 687    | 0.343 | 0.189       | 0.151       | 0.945 | 0.945 | 0.893 | 0.383      |
| 22 | <i>ndhA</i>   | 1092   | 0.379 | 0.189       | 0.149       | 0.867 | 0.887 | 0.769 | 0.368      |
| 23 | <i>rps3</i>   | 666    | 0.373 | 0.191       | 0.149       | 0.882 | 0.898 | 0.792 | 0.365      |
| 24 | <i>rpoB</i>   | 3231   | 0.4   | 0.187       | 0.146       | 0.936 | 0.94  | 0.88  | 0.377      |
| 25 | <i>atpF</i>   | 564    | 0.393 | 0.202       | 0.144       | 0.922 | 0.926 | 0.854 | 0.373      |
| 26 | <i>psbK</i>   | 183    | 0.404 | 0.202       | 0.142       | 0.889 | 0.907 | 0.806 | 0.368      |
| 27 | <i>rps4</i>   | 603    | 0.398 | 0.163       | 0.139       | 0.913 | 0.93  | 0.849 | 0.36       |
| 28 | <i>ycf4</i>   | 639    | 0.398 | 0.293       | 0.138       | 0.881 | 0.908 | 0.801 | 0.376      |
| 29 | <i>rpl36</i>  | 111    | 0.386 | 0.162       | 0.135       | 0.9   | 0.935 | 0.842 | 0.329      |
| 30 | <i>psbI</i>   | 108    | 0.429 | 0.148       | 0.13        | 0.81  | 0.846 | 0.685 | 0.347      |
| 31 | <i>petA</i>   | 966    | 0.402 | 0.161       | 0.128       | 0.867 | 0.884 | 0.767 | 0.336      |
| 32 | <i>rps16</i>  | 267    | 0.375 | 0.348       | 0.127       | 0.932 | 0.937 | 0.873 | 0.371      |
| 33 | <i>rps18</i>  | 351    | 0.353 | 0.279       | 0.12        | 0.964 | 0.97  | 0.935 | 0.372      |
| 34 | <i>ndhE</i>   | 303    | 0.354 | 0.142       | 0.119       | 0.92  | 0.927 | 0.853 | 0.33       |
| 35 | <i>ycf2</i>   | 7725   | 0.381 | 0.399       | 0.118       | 0.964 | 0.966 | 0.931 | 0.396      |
| 36 | <i>rps2</i>   | 720    | 0.413 | 0.192       | 0.117       | 0.937 | 0.938 | 0.879 | 0.35       |
| 37 | <i>ndhG</i>   | 558    | 0.358 | 0.183       | 0.111       | 0.857 | 0.868 | 0.744 | 0.331      |
| 38 | <i>rps14</i>  | 300    | 0.425 | 0.153       | 0.11        | 0.962 | 0.963 | 0.927 | 0.337      |
| 39 | <i>atpA</i>   | 1521   | 0.422 | 0.147       | 0.109       | 0.89  | 0.907 | 0.807 | 0.316      |
| 40 | <i>rpl14</i>  | 366    | 0.406 | 0.139       | 0.109       | 1     | 1     | 1     | 0.305      |
| 41 | <i>ndhH</i>   | 1203   | 0.396 | 0.155       | 0.108       | 0.868 | 0.896 | 0.778 | 0.305      |
| 42 | <i>ndhJ</i>   | 474    | 0.427 | 0.146       | 0.108       | 0.866 | 0.897 | 0.777 | 0.312      |
| 43 | <i>ndhI</i>   | 552    | 0.362 | 0.161       | 0.107       | 0.893 | 0.897 | 0.8   | 0.309      |
| 44 | <i>ndhK</i>   | 870    | 0.401 | 0.416       | 0.106       | 0.944 | 0.954 | 0.9   | 0.369      |
| 45 | <i>atpB</i>   | 1494   | 0.431 | 0.15        | 0.104       | 0.916 | 0.918 | 0.841 | 0.329      |
| 46 | <i>rpl16</i>  | 438    | 0.467 | 0.24        | 0.103       | 0.89  | 0.898 | 0.799 | 0.333      |
| 47 | <i>rbcL</i>   | 1425   | 0.455 | 0.124       | 0.101       | 0.853 | 0.862 | 0.735 | 0.3        |
| 48 | <i>atpI</i>   | 744    | 0.391 | 0.125       | 0.099       | 0.864 | 0.89  | 0.769 | 0.302      |
| 49 | <i>psaI</i>   | 111    | 0.344 | 0.207       | 0.099       | 0.913 | 0.929 | 0.848 | 0.333      |

| #  | Gene         | Length | GC    | Polymorphic | Informative | CI    | RI    | RC    | P-distance |
|----|--------------|--------|-------|-------------|-------------|-------|-------|-------|------------|
| 50 | <i>psbB</i>  | 1524   | 0.445 | 0.124       | 0.098       | 0.884 | 0.904 | 0.799 | 0.299      |
| 51 | <i>psbT</i>  | 114    | 0.372 | 0.228       | 0.096       | 0.9   | 0.933 | 0.84  | 0.338      |
| 52 | <i>petB</i>  | 660    | 0.414 | 0.135       | 0.092       | 0.823 | 0.877 | 0.722 | 0.278      |
| 53 | <i>petG</i>  | 111    | 0.351 | 0.099       | 0.09        | 0.917 | 0.947 | 0.868 | 0.3        |
| 54 | <i>psaB</i>  | 2202   | 0.422 | 0.1         | 0.086       | 0.873 | 0.893 | 0.78  | 0.271      |
| 55 | <i>psaC</i>  | 243    | 0.442 | 0.111       | 0.086       | 0.875 | 0.892 | 0.78  | 0.287      |
| 56 | <i>psbN</i>  | 129    | 0.458 | 0.085       | 0.085       | 0.929 | 0.963 | 0.894 | 0.292      |
| 57 | <i>ndhC</i>  | 366    | 0.389 | 0.137       | 0.082       | 0.865 | 0.889 | 0.769 | 0.298      |
| 58 | <i>psaA</i>  | 2250   | 0.437 | 0.101       | 0.082       | 0.895 | 0.921 | 0.824 | 0.278      |
| 59 | <i>psbC</i>  | 1419   | 0.45  | 0.124       | 0.08        | 0.884 | 0.896 | 0.792 | 0.27       |
| 60 | <i>psbA</i>  | 1059   | 0.433 | 0.101       | 0.075       | 0.893 | 0.901 | 0.804 | 0.27       |
| 61 | <i>psbZ</i>  | 186    | 0.343 | 0.102       | 0.075       | 1     | 1     | 1     | 0.284      |
| 62 | <i>petD</i>  | 633    | 0.388 | 0.321       | 0.074       | 0.77  | 0.806 | 0.621 | 0.282      |
| 63 | <i>psbD</i>  | 1059   | 0.442 | 0.138       | 0.073       | 0.875 | 0.893 | 0.781 | 0.242      |
| 64 | <i>psbF</i>  | 117    | 0.427 | 0.077       | 0.068       | 1     | 1     | 1     | 0.261      |
| 65 | <i>ndhD</i>  | 1500   | 0.365 | 0.754       | 0.067       | 0.891 | 0.875 | 0.779 | 0.355      |
| 66 | <i>atpH</i>  | 249    | 0.467 | 0.173       | 0.064       | 0.955 | 0.963 | 0.919 | 0.248      |
| 67 | <i>rpl2</i>  | 822    | 0.441 | 0.082       | 0.064       | 0.903 | 0.92  | 0.83  | 0.247      |
| 68 | <i>psaJ</i>  | 132    | 0.411 | 0.144       | 0.061       | 0.889 | 0.913 | 0.812 | 0.267      |
| 69 | <i>psbL</i>  | 114    | 0.333 | 0.07        | 0.061       | 1     | 1     | 1     | 0.265      |
| 70 | <i>psbJ</i>  | 120    | 0.462 | 0.1         | 0.058       | 0.875 | 0.909 | 0.795 | 0.274      |
| 71 | <i>rps7</i>  | 465    | 0.408 | 0.06        | 0.056       | 1     | 1     | 1     | 0.232      |
| 72 | <i>petL</i>  | 93     | 0.374 | 0.075       | 0.054       | 1     | 1     | 1     | 0.232      |
| 73 | <i>rps12</i> | 372    | 0.415 | 0.11        | 0.054       | 1     | 1     | 1     | 0.232      |
| 74 | <i>ycf3</i>  | 507    | 0.4   | 0.063       | 0.053       | 0.853 | 0.891 | 0.76  | 0.223      |
| 75 | <i>psbE</i>  | 249    | 0.427 | 0.068       | 0.052       | 0.947 | 0.95  | 0.9   | 0.228      |
| 76 | <i>petN</i>  | 96     | 0.425 | 0.135       | 0.042       | 1     | 1     | 1     | 0.214      |
| 77 | <i>ndhB</i>  | 1542   | 0.377 | 0.053       | 0.041       | 0.959 | 0.967 | 0.927 | 0.196      |
| 78 | <i>psbM</i>  | 102    | 0.334 | 0.069       | 0.039       | 1     | 1     | 1     | 0.221      |
| 79 | <i>rpl23</i> | 288    | 0.382 | 0.062       | 0.024       | 1     | 1     | 1     | 0.158      |
