# Supplementary material for: Why the Monophyly of Nymphaeaceae Currently Remains Indeterminate: An Assessment Based on Gene-Wise Plastid Phylogenomics
Source: Preprints.org preprint supplement (doi:10.20944/preprints201905.0002.v1), 2019-05-03
Supplement: Supplementary file 3 [file supplementary]

### Why the monophyly of Nymphaeaceae currently remains indeterminate: An assessment based on gene-wise plastid phylogenomics

Michael Gruenstaeudl<sup>1\*</sup>

<sup>1</sup> Institut für Biologie, Freie Universität Berlin, 14195 Berlin, Germany

\* [m.gruenstaeudl@fu-berlin.de](mailto:m.gruenstaeudl@fu-berlin.de)

---

**Table S1.** Results of calculating the fractions of polymorphic sites of the three codon positions across the 78 protein-coding plastome genes under study that form the basis for the multiple logistic regression tests of possible effects on the phylogenetic tree inference as well as the overall and pairwise comparisons of the mean fraction values using parametric and non-parametric statistical tests. Also displayed are the best-fitting nucleotide substitution models identified for each of the plastome genes under study. Abbreviations used: CodonOne = fraction of polymorphic sites of codon 1; CodonTwo = fraction of polymorphic sites of codon 2; CodonThree = fraction of polymorphic sites of codon 3; Model = best-fitting nucleotide substitution model; Hypo = hypothesis.

| #  | Gene          | CodonOne | CodonTwo | CodonThree | Model   | HypoA | HypoB | HypoC |
|----|---------------|----------|----------|------------|---------|-------|-------|-------|
| 1  | <i>78 CDS</i> | 0.276    | 0.252    | 0.4        | GTR+G+I | 1     | 0     | 0     |
| 2  | <i>ycf1</i>   | 0.998    | 0.999    | 0.999      | GTR+G   | 1     | 0     | 0     |
| 3  | <i>rps15</i>  | 0.23     | 0.195    | 0.425      | GTR+G   | 1     | 0     | 0     |
| 4  | <i>rpl32</i>  | 0.333    | 0.333    | 0.491      | HKY+G   | 1     | 0     | 0     |
| 5  | <i>atpE</i>   | 0.179    | 0.119    | 0.425      | HKY+G   | 0     | 1     | 0     |
| 6  | <i>ndhF</i>   | 0.24     | 0.176    | 0.423      | GTR+G   | 1     | 0     | 0     |
| 7  | <i>rps19</i>  | 0.232    | 0.253    | 0.485      | HKY+G   | 1     | 0     | 0     |
| 8  | <i>infA</i>   | 0.268    | 0.232    | 0.341      | GTR+G   | 0     | 0     | 1     |
| 9  | <i>matK</i>   | 0.256    | 0.191    | 0.354      | GTR+G   | 1     | 0     | 0     |
| 10 | <i>ccsA</i>   | 0.223    | 0.176    | 0.389      | GTR+G   | 0     | 1     | 0     |
| 11 | <i>rpoC2</i>  | 0.265    | 0.216    | 0.396      | GTR+G   | 0     | 1     | 0     |
| 12 | <i>rpl20</i>  | 0.197    | 0.205    | 0.333      | GTR+I   | 0     | 1     | 0     |
| 13 | <i>accD</i>   | 0.485    | 0.479    | 0.56       | GTR+G   | 1     | 0     | 0     |
| 14 | <i>rpl22</i>  | 0.168    | 0.144    | 0.352      | GTR+G   | 0     | 1     | 0     |
| 15 | <i>rpoA</i>   | 0.208    | 0.182    | 0.353      | GTR+G   | 1     | 0     | 0     |
| 16 | <i>rps11</i>  | 0.138    | 0.109    | 0.348      | SYM+I   | 0     | 1     | 0     |
| 17 | <i>rpoC1</i>  | 0.232    | 0.217    | 0.362      | GTR+G   | 1     | 0     | 0     |
| 18 | <i>rpl33</i>  | 0.118    | 0.118    | 0.279      | GTR     | 1     | 0     | 0     |
| 19 | <i>rps8</i>   | 0.121    | 0.129    | 0.326      | HKY+G   | 0     | 0     | 1     |
| 20 | <i>psbH</i>   | 0.203    | 0.165    | 0.367      | HKY+I   | 0     | 1     | 0     |
| 21 | <i>cemA</i>   | 0.179    | 0.105    | 0.284      | GTR     | 0     | 0     | 1     |
| 22 | <i>ndhA</i>   | 0.146    | 0.096    | 0.324      | GTR+G   | 0     | 1     | 0     |
| 23 | <i>rps3</i>   | 0.162    | 0.09     | 0.32       | GTR+G   | 0     | 0     | 1     |
| 24 | <i>rpoB</i>   | 0.148    | 0.119    | 0.293      | GTR+I   | 0     | 1     | 0     |
| 25 | <i>atpF</i>   | 0.165    | 0.149    | 0.293      | GTR     | 0     | 1     | 0     |
| 26 | <i>psbK</i>   | 0.148    | 0.148    | 0.311      | HKY+G   | 1     | 0     | 0     |
| 27 | <i>rps4</i>   | 0.129    | 0.07     | 0.289      | GTR+G   | 1     | 0     | 0     |
| 28 | <i>ycf4</i>   | 0.216    | 0.244    | 0.418      | HKY+I   | 1     | 0     | 0     |
| 29 | <i>rpl36</i>  | 0.135    | 0.054    | 0.297      | K80     | 0     | 0     | 0     |
| 30 | <i>psbI</i>   | 0.028    | 0.028    | 0.389      | K80+I   | 1     | 0     | 0     |
| 31 | <i>petA</i>   | 0.087    | 0.075    | 0.323      | GTR+G   | 0     | 0     | 1     |
| 32 | <i>rps16</i>  | 0.303    | 0.315    | 0.427      | HKY     | 1     | 0     | 0     |
| 33 | <i>rps18</i>  | 0.248    | 0.248    | 0.342      | HKY+I   | 1     | 0     | 0     |
| 34 | <i>ndhE</i>   | 0.069    | 0.03     | 0.327      | GTR+I   | 1     | 0     | 0     |
| 35 | <i>ycf2</i>   | 0.406    | 0.391    | 0.4        | GTR+G   | 1     | 0     | 0     |
| 36 | <i>rps2</i>   | 0.142    | 0.142    | 0.292      | GTR+G   | 0     | 1     | 0     |
| 37 | <i>ndhG</i>   | 0.14     | 0.124    | 0.285      | GTR+G+I | 0     | 0     | 1     |
| 38 | <i>rps14</i>  | 0.12     | 0.07     | 0.27       | HKY+G   | 0     | 0     | 1     |
| 39 | <i>atpA</i>   | 0.093    | 0.059    | 0.288      | GTR+G   | 0     | 1     | 0     |
| 40 | <i>rpl14</i>  | 0.049    | 0.041    | 0.328      | GTR+I   | 1     | 0     | 0     |
| 41 | <i>ndhH</i>   | 0.102    | 0.067    | 0.294      | GTR+I   | 1     | 0     | 0     |
| 42 | <i>ndhJ</i>   | 0.12     | 0.082    | 0.234      | GTR+I   | 0     | 0     | 1     |
| 43 | <i>ndhI</i>   | 0.114    | 0.098    | 0.272      | GTR+G   | 0     | 0     | 0     |
| 44 | <i>ndhK</i>   | 0.379    | 0.369    | 0.5        | GTR+I   | 1     | 0     | 0     |
| 45 | <i>atpB</i>   | 0.09     | 0.05     | 0.309      | GTR+G   | 1     | 0     | 0     |
| 46 | <i>rpl16</i>  | 0.192    | 0.144    | 0.384      | HKY+I   | 1     | 0     | 0     |
| 47 | <i>rbcL</i>   | 0.076    | 0.029    | 0.267      | GTR+G+I | 0     | 1     | 0     |
| 48 | <i>atpI</i>   | 0.069    | 0.036    | 0.27       | GTR+I   | 0     | 1     | 0     |
| 49 | <i>psaI</i>   | 0.27     | 0.081    | 0.27       | HKY     | 0     | 1     | 0     |

| #  | Gene         | CodonOne | CodonTwo | CodonThree | Model | HypoA | HypoB | HypoC |
|----|--------------|----------|----------|------------|-------|-------|-------|-------|
| 50 | <i>psbB</i>  | 0.057    | 0.031    | 0.283      | GTR+G | 1     | 0     | 0     |
| 51 | <i>psbT</i>  | 0.237    | 0.158    | 0.289      | K80   | 1     | 0     | 0     |
| 52 | <i>petB</i>  | 0.059    | 0.036    | 0.309      | HKY+I | 0     | 1     | 0     |
| 53 | <i>petG</i>  | 0        | 0.081    | 0.216      | HKY   | 0     | 0     | 0     |
| 54 | <i>psaB</i>  | 0.04     | 0.014    | 0.248      | GTR+I | 0     | 0     | 1     |
| 55 | <i>psaC</i>  | 0.025    | 0.012    | 0.296      | K80+G | 1     | 0     | 0     |
| 56 | <i>psbN</i>  | 0.047    | 0.047    | 0.163      | K80+I | 0     | 1     | 0     |
| 57 | <i>ndhC</i>  | 0.098    | 0.066    | 0.246      | GTR+G | 0     | 0     | 1     |
| 58 | <i>psaA</i>  | 0.044    | 0.017    | 0.241      | GTR+I | 0     | 1     | 0     |
| 59 | <i>psbC</i>  | 0.063    | 0.04     | 0.268      | GTR+I | 0     | 1     | 0     |
| 60 | <i>psbA</i>  | 0.04     | 0.008    | 0.255      | GTR+I | 0     | 0     | 0     |
| 61 | <i>psbZ</i>  | 0.097    | 0.032    | 0.177      | HKY+I | 0     | 1     | 0     |
| 62 | <i>petD</i>  | 0.261    | 0.251    | 0.45       | GTR+I | 0     | 1     | 0     |
| 63 | <i>psbD</i>  | 0.085    | 0.059    | 0.269      | GTR+I | 1     | 0     | 0     |
| 64 | <i>psbF</i>  | 0.026    | 0.026    | 0.179      | JC    | 0     | 0     | 0     |
| 65 | <i>ndhD</i>  | 0.728    | 0.728    | 0.806      | GTR+G | 0     | 0     | 1     |
| 66 | <i>atpH</i>  | 0.12     | 0.108    | 0.289      | SYM   | 1     | 0     | 0     |
| 67 | <i>rpl2</i>  | 0.044    | 0.055    | 0.146      | HKY+G | 0     | 0     | 1     |
| 68 | <i>psaJ</i>  | 0.045    | 0.091    | 0.295      | K80+I | 1     | 0     | 0     |
| 69 | <i>psbL</i>  | 0.026    | 0.053    | 0.132      | HKY+I | 0     | 0     | 0     |
| 70 | <i>psbJ</i>  | 0.15     | 0.025    | 0.125      | JC+I  | 0     | 1     | 0     |
| 71 | <i>rps7</i>  | 0.065    | 0.045    | 0.071      | HKY+I | 0     | 0     | 1     |
| 72 | <i>petL</i>  | 0.032    | 0.129    | 0.065      | K80+I | 0     | 0     | 0     |
| 73 | <i>rps12</i> | 0.065    | 0.097    | 0.169      | F81+I | 0     | 1     | 0     |
| 74 | <i>ycf3</i>  | 0.012    | 0.024    | 0.154      | GTR+I | 0     | 0     | 1     |
| 75 | <i>psbE</i>  | 0.036    | 0.024    | 0.145      | K80+I | 0     | 0     | 1     |
| 76 | <i>petN</i>  | 0.156    | 0.094    | 0.156      | JC    | 0     | 0     | 0     |
| 77 | <i>ndhB</i>  | 0.035    | 0.049    | 0.074      | GTR+I | 1     | 0     | 0     |
| 78 | <i>psbM</i>  | 0.029    | 0.029    | 0.147      | JC    | 0     | 0     | 0     |
| 79 | <i>rpl23</i> | 0.062    | 0.062    | 0.062      | F81   | 0     | 0     | 0     |
